# Supplementary material for: Comparative Analysis of Colon Cancer-Derived Fusobacterium nucleatum Subspecies: Inflammation and Colon Tumorigenesis in Murine Models
Source: PubMed Central journal article supplement (PMC8822350; doi:10.1128/mbio.02991-21), 2022-02-08
Supplement: mbio.02991-21-st002.pdf [file mbio.02991-21-st002.pdf]

| Taqman Assay ID | Gene Symbol | Gene Name                                       | GF Control                  | CRC-Fna                     |               | CRC-Fnv                     |               | CRC-Fnp_c                   |               | CRC-Fnp_nc                  |               | nonCRC-Fna                  |               | nonCRC-Fnn                  |               |
|-----------------|-------------|-------------------------------------------------|-----------------------------|-----------------------------|---------------|-----------------------------|---------------|-----------------------------|---------------|-----------------------------|---------------|-----------------------------|---------------|-----------------------------|---------------|
|                 |             |                                                 | Median 2 <sup>-</sup> -DDCt | Median 2 <sup>-</sup> -DDCt | p-value       | Median 2 <sup>-</sup> -DDCt | p-value       | Median 2 <sup>-</sup> -DDCt | p-value       | Median 2 <sup>-</sup> -DDCt | p-value       | Median 2 <sup>-</sup> -DDCt | p-value       | Median 2 <sup>-</sup> -DDCt | p-value       |
| Mm01179194_m1   | Cd3e        | CD3 antigen, epsilon polypeptide                | 0.8230                      | <b>1.9421</b>               | <b>0.0303</b> | 3.4368                      | 0.4762        | 2.4551                      | 0.0952        | 0.8757                      | 0.9143        | 0.5705                      | 0.0952        | 0.7996                      | 0.5476        |
| Mm00442754_m1   | Cd4         | CD4 antigen                                     | 1.0063                      | 2.2855                      | 0.2468        | 2.0742                      | 0.4762        | 2.3523                      | 0.1667        | 0.6818                      | 0.3524        | 0.4067                      | 0.0952        | <b>0.3128</b>               | <b>0.0476</b> |
| Mm01182107_g1   | Cd8a        | CD8 antigen, alpha chain                        | 0.7445                      | 1.5568                      | 0.0823        | 4.0686                      | 0.7619        | 1.3837                      | 0.2619        | 0.6751                      | 0.4762        | 0.4458                      | 0.1667        | <b>0.5125</b>               | <b>0.0476</b> |
| Mm00491152_m1   | Cd33        | CD33 antigen                                    | 1.0177                      | 1.4162                      | 0.0519        | 1.5338                      | 0.1143        | 1.4910                      | 0.2619        | 1.1442                      | 0.6095        | 0.6400                      | 0.1667        | <b>0.4703</b>               | <b>0.0476</b> |
| Mm01168134_m1   | ifng        | interferon gamma                                | 1.2507                      | 1.0088                      | 0.0823        | 1.7490                      | 0.6095        | 0.7293                      | 0.5476        | 0.7243                      | 0.3524        | 0.5301                      | 0.2619        | 0.7643                      | 0.9048        |
| Mm00439618_m1   | Il17a       | interleukin 17A                                 | 1.6370                      | 7.5656                      | 0.0519        | 10.2217                     | 0.2571        | 7.3835                      | 0.2619        | 6.1168                      | 0.0095        | 0.8223                      | 0.9048        | 0.9928                      | 0.9048        |
| Mm00443258_m1   | Tnf         | tumor necrosis factor                           | 0.7542                      | 2.0984                      | 0.0519        | 3.8083                      | 0.1143        | 1.6203                      | 0.3810        | 0.6187                      | 0.3524        | <b>0.4537</b>               | <b>0.0238</b> | 0.5491                      | 0.2619        |
| Mm01226722_g1   | Il22        | interleukin 22                                  | 0.5905                      | 4.0359                      | 0.2468        | 0.2658                      | 0.3524        | 0.2059                      | 0.0952        | 1.3835                      | 0.9143        | 0.0318                      | 0.2619        | 1.7751                      | 0.9048        |
| Mm00446190_m1   | Il6         | interleukin 6                                   | 0.9152                      | 2.3580                      | 0.1775        | 2.0432                      | 0.0667        | 1.8304                      | 0.1667        | <b>0.5707</b>               | <b>0.0095</b> | 0.5740                      | 0.0238        | <b>0.4939</b>               | <b>0.0238</b> |
| Mm01288386_m1   | Il10        | interleukin 10                                  | 1.0088                      | 1.4367                      | 0.0519        | 2.7691                      | 0.3524        | 0.8212                      | 0.9048        | 0.8282                      | 0.9143        | 0.9406                      | 0.7143        | 0.5786                      | 0.2619        |
| Mm00434228_m1   | Il1b        | interleukin 1 beta                              | 1.2860                      | 1.3316                      | 0.7922        | 1.0093                      | >0.9999       | 1.0212                      | 0.5476        | 0.4133                      | 0.0667        | <b>0.2526</b>               | <b>0.0476</b> | 0.3463                      | 0.1667        |
| Mm00518984_m1   | Il23a       | interleukin 23, alpha subunit p19               | 1.2176                      | 1.2688                      | 0.2468        | 1.4392                      | 0.6095        | 1.8551                      | 0.1667        | 0.5753                      | 0.1143        | 0.6842                      | 0.3810        | <b>0.3746</b>               | <b>0.0238</b> |
| Mm00434169_m1   | Il12a       | interleukin 12a                                 | 0.8946                      | 1.1749                      | 0.2468        | 2.5205                      | 0.7619        | 1.3065                      | 0.5476        | 0.7544                      | 0.7619        | 0.2800                      | 0.1667        | <b>0.2631</b>               | <b>0.0238</b> |
| Mm00505403_m1   | Il33        | interleukin 33                                  | 1.0396                      | 1.8047                      | 0.3290        | 1.7600                      | <b>0.0381</b> | 1.4368                      | 0.0952        | <b>0.5928</b>               | <b>0.0381</b> | <b>0.4514</b>               | <b>0.0238</b> | <b>0.3650</b>               | <b>0.0238</b> |
| Mm00499822_m1   | Il25        | interleukin 25                                  | 1.0065                      | 2.2492                      | 0.5368        | 1.6891                      | 0.5571        | 1.2097                      | >0.9999       | 0.9515                      | 0.9143        | 0.5511                      | 0.2619        | 0.4854                      | 0.1667        |
| Mm04207460_m1   | Cxcl1       | chemokine (C-X-C motif) ligand 1                | 0.9880                      | 1.0458                      | 0.0519        | 2.0145                      | 0.9143        | 1.1441                      | 0.9048        | 1.0128                      | >0.9999       | 0.8237                      | 0.3810        | 1.9727                      | 0.5476        |
| Mm00436450_m1   | Cxcl2       | chemokine (C-X-C motif) ligand 2                | 0.9608                      | 1.7079                      | 0.0519        | 1.8420                      | 0.1143        | 1.3627                      | 0.3810        | 0.6301                      | 0.2571        | <b>0.4122</b>               | <b>0.0238</b> | 1.1646                      | >0.9999       |
| Mm00434946_m1   | Cxcl9       | chemokine (C-X-C motif) ligand 9                | 1.1709                      | 0.7002                      | 0.2468        | 2.4060                      | 0.9143        | 0.8548                      | 0.9048        | 0.8753                      | >0.9999       | 0.2401                      | 0.0952        | 0.2871                      | 0.3810        |
| Mm00475988_m1   | Arg1        | arginase, liver                                 | 1.0644                      | 2.2673                      | 0.1255        | <b>2.6974</b>               | <b>0.0190</b> | <b>2.9429</b>               | <b>0.0476</b> | 0.6112                      | 0.1714        | 0.6647                      | 0.2619        | 0.5440                      | 0.0952        |
| Mm00492590_m1   | Ido1        | indoleamine 2,3-dioxygenase 1                   | 1.0176                      | 1.0889                      | 0.1775        | 2.1097                      | 0.7619        | 0.9180                      | >0.9999       | 1.0519                      | 0.7619        | <b>0.4083</b>               | <b>0.0238</b> | 1.2939                      | 0.7143        |
| Mm03048248_m1   | Cd274       | CD274 antigen                                   | 1.0348                      | 2.1192                      | 0.1255        | <b>2.1711</b>               | <b>0.0381</b> | 1.7904                      | 0.1667        | 0.9224                      | 0.3524        | 0.7909                      | 0.5476        | 0.5852                      | 0.5476        |
| Mm01261022_m1   | Rorc        | RAR-related orphan receptor gamma               | 1.1857                      | 1.6062                      | 0.0823        | 1.6002                      | 0.2571        | 1.3106                      | 0.3810        | <b>0.4145</b>               | <b>0.0381</b> | 0.5356                      | 0.0952        | <b>0.3550</b>               | <b>0.0238</b> |
| Mm00450960_m1   | Tbx21       | T-box 21                                        | 0.8908                      | 1.5865                      | 0.4286        | 2.5513                      | 0.4762        | 1.0343                      | 0.7143        | 0.5584                      | 0.1143        | <b>0.4359</b>               | <b>0.0238</b> | <b>0.3865</b>               | <b>0.0476</b> |
| Mm00484683_m1   | Gata3       | GATA binding protein 3                          | 1.1362                      | 2.1470                      | 0.0519        | 2.7862                      | 0.1143        | 1.8443                      | 0.3810        | <b>0.4024</b>               | <b>0.0381</b> | <b>0.3856</b>               | <b>0.0238</b> | <b>0.3062</b>               | <b>0.0238</b> |
| Mm00475162_m1   | Foxp3       | forkhead box P3                                 | 0.7760                      | 2.1777                      | 0.0519        | 4.3339                      | 0.1143        | 2.8888                      | 0.0952        | 0.9650                      | 0.4762        | 0.3937                      | 0.1667        | 0.3570                      | 0.2619        |
| Mm00434214_m1   | Il17ra      | interleukin 17 receptor A                       | 1.2921                      | 1.6407                      | 0.1255        | 1.9773                      | 0.1714        | 1.4454                      | 0.3810        | 0.5146                      | 0.0667        | <b>0.3892</b>               | <b>0.0476</b> | <b>0.3586</b>               | <b>0.0238</b> |
| Mm00656927_g1   | Saa1        | serum amyloid A 1                               | 0.8448                      | 0.6455                      | 0.4286        | 0.7247                      | 0.2571        | 0.7590                      | 0.3810        | 1.5345                      | 0.2571        | 1.2168                      | 0.7143        | 1.0552                      | 0.7143        |
| Mm00496696_g1   | S100a8      | S100 calcium binding protein A8 (calgranulin A) | 1.1030                      | <b>1.0805</b>               | <b>0.0303</b> | 1.9850                      | 0.9143        | 1.4515                      | 0.3810        | 0.5894                      | 0.1714        | 0.7237                      | 0.9048        | 0.7091                      | 0.2619        |
| Mm00656925_m1   | S100a9      | S100 calcium binding protein A9 (calgranulin B) | 1.6489                      | 0.2927                      | 0.4286        | 2.1177                      | 0.6095        | 1.6195                      | 0.9048        | 1.0736                      | 0.4762        | 1.3931                      | 0.9048        | 1.2681                      | 0.9048        |
| Mm03294838_g1   | COX2        | cytochrome c oxidase subunit II                 | 0.5581                      | 0.5559                      | 0.4286        | 0.4764                      | 0.7619        | 0.4697                      | 0.3810        | 2.7556                      | 0.3524        | 2.7208                      | 0.3810        | 2.6132                      | 0.5476        |
| Mm01192943_m1   | Il22ra1     | interleukin 22 receptor, alpha 1                | 1.2812                      | <b>1.7519</b>               | <b>0.0173</b> | 1.7881                      | 0.1714        | 1.3684                      | 0.7143        | 0.5321                      | 0.2571        | 0.4778                      | 0.0952        | <b>0.4478</b>               | <b>0.0238</b> |
| Mm00432403_m1   | Cd36        | CD36 antigen                                    | 11.5013                     | 13.2098                     | 0.9307        | 18.5755                     | 0.7619        | 16.3530                     | 0.7143        | 6.7479                      | 0.1714        | 7.6892                      | 0.3810        | 5.2139                      | 0.2619        |
| Mm00463327_m1   | Il1f9       | interleukin 1 family, member 9                  | 3.8584                      | 6.5634                      | 0.1255        | 7.5870                      | 0.3524        | <b>11.7625</b>              | <b>0.0476</b> | 2.2243                      | 0.4762        | 3.5406                      | 0.9048        | 1.8510                      | 0.5476        |
| Mm01329359_m1   | Mrc1        | mannose receptor, C type 1                      | 1.0806                      | 1.2952                      | 0.3290        | 1.5779                      | 0.1143        | 1.4477                      | 0.2619        | 0.6651                      | 0.0667        | 0.6531                      | 0.0952        | 0.4642                      | 0.0476        |
| Mm01276696_m1   | Muc2        | mucin 2                                         | 0.9893                      | 0.9161                      | 0.1255        | 0.7819                      | 0.9143        | 0.8513                      | 0.2619        | 1.2244                      | 0.4762        | 1.0239                      | 0.9048        | 0.8547                      | 0.0952        |
| Mm00441127_m1   | Reg3g       | regenerating islet-derived 3 gamma              | 1.2784                      | 1.3104                      | 0.5368        | 1.6605                      | 0.6095        | 1.2018                      | 0.5476        | 0.3172                      | 0.0667        | 0.2894                      | 0.0952        | <b>0.2234</b>               | <b>0.0476</b> |
| Mm00657074_m1   | Defb2       | defensin beta 2                                 | 1.6580                      | 1.9346                      | >0.9999       | 1.2791                      | 0.3524        | 1.4203                      | 0.9048        | 0.0939                      | 0.0095        | 0.2194                      | 0.5476        | <b>0.0925</b>               | <b>0.0238</b> |
| Mm00484518_s1   | Fut1        | fucosyltransferase 1                            | 0.9259                      | 1.8193                      | 0.1775        | 2.1948                      | 0.1143        | 1.6265                      | 0.1667        | 0.9380                      | >0.9999       | 0.8458                      | 0.7143        | 0.6156                      | 0.1667        |
| Mm00487804_m1   | Myc         | myelocytomatosis oncogene                       | 1.0090                      | <b>1.6851</b>               | <b>0.0043</b> | <b>2.3979</b>               | <b>0.0190</b> | <b>1.8830</b>               | <b>0.0476</b> | 0.9249                      | 0.6095        | <b>0.6632</b>               | <b>0.0238</b> | <b>0.6459</b>               | <b>0.0238</b> |
| Mm01247357_m1   | Cdh1        | cadherin 1                                      | 1.1427                      | 1.1114                      | 0.9307        | 1.1595                      | >0.9999       | 1.2002                      | 0.7143        | 1.0037                      | 0.7619        | 0.7158                      | 0.2619        | <b>0.5175</b>               | <b>0.0238</b> |
| Mm04204476_m1   | Ceacam1     | carcinoembryonic antigen-related cell adhesion  | 0.9916                      | 0.9056                      | 0.4286        | 0.8862                      | 0.4762        | 0.8925                      | 0.5476        | 0.9305                      | 0.6095        | 0.8386                      | 0.7143        | <b>0.6986</b>               | <b>0.0238</b> |
| Mm01208059_m1   | Nos1        | nitric oxide synthase 1, neuronal               | 0.9195                      | 1.6594                      | 0.6623        | 1.1369                      | 0.2571        | 1.1787                      | >0.9999       | 0.6379                      | 0.3524        | 0.7301                      | 0.2619        | 0.4677                      | 0.0952        |
| Mm00549170_m1   | Nox1        | NADPH oxidase 1                                 | 1.1467                      | 0.5763                      | 0.2468        | 0.8723                      | 0.2571        | 0.7177                      | 0.7143        | 1.4104                      | 0.3524        | 1.1463                      | 0.9048        | 0.9288                      | 0.7143        |
| Mm01287743_m1   | Cybb        | cytochrome b-245, beta polypeptide              | 1.0728                      | 1.6675                      | 0.0519        | 2.4221                      | 0.1714        | 1.8247                      | 0.2619        | 0.8482                      | 0.4762        | 0.4405                      | 0.0952        | <b>0.3876</b>               | <b>0.0238</b> |
| Mm01298424_m1   | Mpo         | myeloperoxidase                                 | 2.1417                      | 14.0747                     | >0.9999       | 0.1584                      | 0.7619        | 0.1227                      | 0.9048        | 13.6023                     | 0.4762        | 14.8908                     | 0.1667        | 0.0177                      | 0.1667        |

Normalized to Housekeeping Genes:

|               |       |                                          |
|---------------|-------|------------------------------------------|
| Mm9999915_g1  | Gapdh | glyceraldehyde-3-phosphate dehydrogenase |
| Mm01197698_m1 | Gusb  | glucuronidase, beta                      |
